# Supplementary material for: Randomized clinical trials in orthodontics are rarely registered a priori and often published late or not at all
Source: PLOS journal article supplement (doi:10.1371/journal.pone.0182785), 2017-08-04
Supplement: S1 (10.1371/journal.pone.0182785.s001) [file journal.pone.0182785.s001]

## Supporting Information file

**Randomized clinical trials in orthodontics are rarely registered *a priori* and often published late or not at all**

**Table A.** Registry searches performed with identified hits.

| Electronic databases                                                                        | Search query | Registered trials | Completed trials |
|---------------------------------------------------------------------------------------------|--------------|-------------------|------------------|
| ClinicalTrials<br><a href="http://www.clinicaltrials.gov">http://www.clinicaltrials.gov</a> | orthodontic  | 193               | 67               |
| ISRCTN<br><a href="https://www.isrctn.com/">https://www.isrctn.com/</a>                     | orthodontic  | 73                | 63               |

**Table B.** List of included and excluded studies with reasons.

| AA | Source | Trial registration no. | Status                                                  |
|----|--------|------------------------|---------------------------------------------------------|
| 1  | CT     | NCT01510483            | Excluded; non-orthodontic subject                       |
| 2  | CT     | NCT02052973            | Excluded; non-orthodontic subject                       |
| 3  | CT     | NCT02574468            | Excluded; non-orthodontic subject                       |
| 4  | CT     | NCT01874041            | Excluded; non-orthodontic subject                       |
| 5  | CT     | NCT00471393            | Excluded; non-orthodontic subject                       |
| 6  | CT     | NCT02338180            | Excluded; non-orthodontic subject                       |
| 7  | CT     | NCT01562249            | Excluded; non-orthodontic subject                       |
| 8  | CT     | NCT02205619            | Excluded; non-orthodontic subject                       |
| 9  | IS     | ISRCTN00627732         | Excluded; non-orthodontic subject                       |
| 10 | IS     | ISRCTN02309506         | Excluded; non-orthodontic subject                       |
| 11 | IS     | ISRCTN10075349         | Excluded; non-orthodontic subject                       |
| 12 | IS     | ISRCTN10406748         | Excluded; non-orthodontic subject                       |
| 13 | IS     | ISRCTN10628521         | Excluded; non-orthodontic subject                       |
| 14 | IS     | ISRCTN11742127         | Excluded; non-orthodontic subject                       |
| 15 | IS     | ISRCTN13234871         | Excluded; non-orthodontic subject                       |
| 16 | IS     | ISRCTN14209449         | Excluded; non-orthodontic subject                       |
| 17 | IS     | ISRCTN16336355         | Excluded; non-orthodontic subject                       |
| 18 | IS     | ISRCTN16831120         | Excluded; non-orthodontic subject                       |
| 19 | IS     | ISRCTN20110108         | Excluded; non-orthodontic subject                       |
| 20 | IS     | ISRCTN20457739         | Excluded; non-orthodontic subject                       |
| 21 | IS     | ISRCTN23257928         | Excluded; non-orthodontic subject                       |
| 22 | IS     | ISRCTN31051582         | Excluded; non-orthodontic subject                       |
| 23 | IS     | ISRCTN42909440         | Excluded; non-orthodontic subject                       |
| 24 | IS     | ISRCTN52296479         | Excluded; non-orthodontic subject                       |
| 25 | IS     | ISRCTN55245733         | Excluded; non-orthodontic subject                       |
| 26 | IS     | ISRCTN55537791         | Excluded; non-orthodontic subject                       |
| 27 | IS     | ISRCTN64254080         | Excluded; non-orthodontic subject                       |
| 28 | IS     | ISRCTN65592532         | Excluded; non-orthodontic subject                       |
| 29 | IS     | ISRCTN72589426         | Excluded; non-orthodontic subject                       |
| 30 | IS     | ISRCTN76727312         | Excluded; non-orthodontic subject                       |
| 31 | IS     | ISRCTN84216266         | Excluded; non-orthodontic subject                       |
| 32 | IS     | ISRCTN57974544         | Excluded; non-orthodontic subject                       |
| 33 | CT     | NCT00154518            | Excluded; no randomized trial                           |
| 34 | CT     | NCT02267837            | Excluded; no randomized trial                           |
| 35 | CT     | NCT02290158            | Excluded; no randomized trial                           |
| 36 | CT     | NCT01630473            | Excluded; no randomized trial                           |
| 37 | CT     | NCT00155311            | Excluded; no randomized trial                           |
| 38 | CT     | NCT00137137            | Excluded; no randomized trial                           |
| 39 | CT     | NCT02267811            | Excluded; no randomized trial                           |
| 40 | CT     | NCT03008681            | Excluded; no randomized trial                           |
| 41 | CT     | NCT01642693            | Excluded; no randomized trial                           |
| 42 | CT     | NCT00099814            | Excluded; no randomized trial                           |
| 43 | CT     | NCT00248014            | Excluded; no randomized trial                           |
| 44 | CT     | NCT02456220            | Excluded; no randomized trial                           |
| 45 | CT     | NCT02574117            | Excluded; no randomized trial                           |
| 46 | CT     | NCT02364414            | Excluded; no randomized trial                           |
| 47 | IS     | ISRCTN66553029         | Excluded; no randomized trial                           |
| 48 | IS     | ISRCTN47483728         | Excluded; no randomized trial                           |
| 49 | IS     | ISRCTN70334837         | Excluded; problematic registration-publication matching |
| 50 | IS     | ISRCTN67900267         | Included                                                |
| 51 | CT     | NCT01695928            | Included                                                |
| 52 | IS     | ISRCTN24433142         | Included                                                |

|     |    |                                   |                                    |
|-----|----|-----------------------------------|------------------------------------|
| 53  | CT | NCT00995436                       | Included                           |
| 54  | IS | ISRCTN51381850                    | Included                           |
| 55  | IS | ISRCTN05296896                    | Included                           |
| 56  | IS | ISRCTN61138858;<br>ISRCTN26364810 | Included; two registrations merged |
| 57  | IS | ISRCTN79884739                    | Included                           |
| 58  | CT | NCT02568436                       | Included                           |
| 59  | IS | ISRCTN38986023                    | Included                           |
| 60  | CT | NCT01657539                       | Included                           |
| 61  | CT | NCT01329731                       | Included                           |
| 62  | IS | ISRCTN66185030                    | Included                           |
| 63  | IS | ISRCTN27557210                    | Included                           |
| 64  | CT | NCT00681135                       | Included                           |
| 65  | IS | ISRCTN52655400                    | Included                           |
| 66  | CT | NCT01768390                       | Included                           |
| 67  | CT | NCT01637948                       | Included                           |
| 68  | CT | NCT01059058                       | Included                           |
| 69  | CT | NCT02209818                       | Included                           |
| 70  | CT | NCT02332421                       | Included                           |
| 71  | CT | NCT02590835                       | Included                           |
| 72  | CT | NCT01770782                       | Included                           |
| 73  | CT | NCT02314975                       | Included                           |
| 74  | CT | NCT02357771                       | Included                           |
| 75  | CT | NCT01490385                       | Included                           |
| 76  | CT | NCT00519415                       | Included                           |
| 77  | IS | ISRCTN05771195                    | Included                           |
| 78  | IS | ISRCTN10014340                    | Included                           |
| 79  | IS | ISRCTN76156631                    | Included                           |
| 80  | CT | NCT02154594                       | Included                           |
| 81  | CT | NCT02337192                       | Included                           |
| 82  | CT | NCT02525458                       | Included                           |
| 83  | IS | ISRCTN04899524                    | Included                           |
| 84  | CT | NCT02427282                       | Included                           |
| 85  | CT | NCT01720797                       | Included                           |
| 86  | IS | ISRCTN32707822                    | Included                           |
| 87  | CT | NCT02267850                       | Included                           |
| 88  | CT | NCT01500187                       | Included                           |
| 89  | CT | NCT01654419                       | Included                           |
| 90  | CT | NCT03004196                       | Included                           |
| 91  | IS | ISRCTN14164814                    | Included                           |
| 92  | IS | ISRCTN35457694                    | Included                           |
| 93  | CT | NCT00484744                       | Included                           |
| 94  | CT | NCT02606331                       | Included                           |
| 95  | CT | NCT02024139                       | Included                           |
| 96  | CT | NCT01948349                       | Included                           |
| 97  | CT | NCT01164631                       | Included                           |
| 98  | CT | NCT02424097                       | Included                           |
| 99  | CT | NCT02026258                       | Included                           |
| 100 | CT | NCT02415673                       | Included                           |
| 101 | CT | NCT00830947                       | Included                           |
| 102 | IS | ISRCTN29710460                    | Included                           |
| 103 | CT | NCT01962012                       | Included                           |
| 104 | IS | ISRCTN05340070                    | Included                           |
| 105 | CT | NCT02745626                       | Included                           |

|     |    |                |          |
|-----|----|----------------|----------|
| 106 | IS | ISRCTN33826201 | Included |
| 107 | IS | ISRCTN61972161 | Included |
| 108 | IS | ISRCTN80447398 | Included |
| 109 | CT | NCT01745653    | Included |
| 110 | CT | NCT01962766    | Included |
| 111 | IS | ISRCTN68289972 | Included |
| 112 | CT | NCT02798822    | Included |
| 113 | CT | NCT01344473    | Included |
| 114 | IS | ISRCTN38412478 | Included |
| 115 | IS | ISRCTN46246539 | Included |
| 116 | IS | ISRCTN53821842 | Included |
| 117 | CT | NCT02267824    | Included |
| 118 | CT | NCT02427763    | Included |
| 119 | CT | NCT01771692    | Included |
| 120 | IS | ISRCTN97142521 | Included |
| 121 | IS | ISRCTN79526387 | Included |
| 122 | CT | NCT00213434    | Included |
| 123 | IS | ISRCTN22535947 | Included |
| 124 | IS | ISRCTN41545651 | Included |
| 125 | IS | ISRCTN75477546 | Included |
| 126 | IS | ISRCTN83971890 | Included |
| 127 | IS | ISRCTN14198853 | Included |
| 128 | IS | ISRCTN56295329 | Included |
| 129 | IS | ISRCTN56613406 | Included |

CT, ClinicalTrials.gov register; IS, ISRCTN register.

**Table C.** Differences in the time from completion to publication for the 33 published trials. (P values correspond to Kruskal-Wallis test)

| Factor                 | Category               | N <sup>a</sup> | Median (IQR)     | P value |
|------------------------|------------------------|----------------|------------------|---------|
| Registry               | ClinicalTrials.gov     | 20             | 12.9 (7.7-22.7)  | 0.001   |
|                        | ISRCTN                 | 13             | 31.6 (27.1-46.7) |         |
| Sponsor                | Internal               | 14             | 10.6 (8.3-17.3)  | 0.05    |
|                        | Government             | 10             | 30.5 (23.8-42.3) |         |
|                        | Commercial             | 3              | 29.3 (13.8-36.6) |         |
|                        | Other                  | 6              | 26.4 (7.0-29.0)  |         |
| Affiliation            | University             | 26             | 16.5 (9.0-29.4)  | 0.15    |
|                        | Private practice       | 0              |                  |         |
|                        | Hospital               | 7              | 29.3 (13.3-62.0) |         |
| Geographical origin    | Europe                 | 20             | 28.4 (14.2-39.5) | 0.11    |
|                        | Asia                   | 8              | 10.5 (5.4-15.5)  |         |
|                        | North America          | 2              | 19.7 (14.2-25.2) |         |
|                        | South America & Africa |                | 20.1 (8.3-29.0)  |         |
| Registration           | Prospective            | 7              | 13.8 (9.0-31.6)  | 0.57    |
|                        | Retrospective          | 26             | 24.5 (9.1-32.5)  |         |
| Outcome                | Objective              | 31             | 20.1 (9.1-31.6)  | 0.65    |
|                        | Subjective             | 2              | 37.0 (9.0-65.0)  |         |
| Multicenter            | Yes                    | 2              | 38.0 (29.3-46.7) | 0.17    |
|                        | No                     | 31             | 17.3 (9.0-31.6)  |         |
| Patients               | Children               | 14             | 30.5 (15.6-55.8) | 0.009   |
|                        | Adults                 | 2              | 7.6 (1.8-13.3)   |         |
|                        | Mixed                  | 15             | 13.8 (7.0-25.2)  |         |
|                        | Not specified          | 2              | 29.8 (27.1-32.5) |         |
| Large (≥ 100 patients) | Yes                    | 4              | 47.8 (23.3-64.5) | 0.05    |
|                        | No                     | 28             | 16.5 (9.0-29.4)  |         |
| Journal                | Specialty              | 21             | 27.5 (15.1-42.3) | 0.005   |
|                        | Non-specialty          | 12             | 10.5 (5.7-18.7)  |         |
| Journal with Epub      | Yes                    | 18             | 17.9 (8.3-32.5)  | 0.49    |
|                        | No                     | 15             | 23.8 (13.3-31.6) |         |
| Findings               | Positive               | 15             | 14.2 (7.0-29.0)  | 0.11    |
|                        | Non positive           | 14             | 26.2 (9.1-36.6)  |         |
|                        | Unclear                | 4              | 37.4 (22.3-53.2) |         |

IQR, interquartile range; ISRCTN, International Standard Randomised Controlled Trial Number.

**Table D.** Influence of protocol or trial publication characteristics on the completion-to-publication survival function of the included registered trial protocols (P values from log-rank test).

| Factor                                                             | N <sup>a</sup> | Significant | P value     |
|--------------------------------------------------------------------|----------------|-------------|-------------|
| Register (ClinicalTrials.gov or ISRCTN)                            | 80             | *           | 0.008*      |
| Sponsor (internal, government, external commercial, other)         | 80             |             | 0.37        |
| Trial affiliation (university, practice or hospital)               | 80             |             | 0.71        |
| Geographic (Europe, Asia, N. America, <b>or</b> S. America/Africa) | 80             | *           | <0.001**    |
| Registration timing (prospective or retrospective)                 | 80             |             | 0.62        |
| Outcome (patient-reported or doctor-assessed)                      | 79             |             | <b>0.48</b> |
| Multicenter (yes or no)                                            | 80             |             | 0.48        |
| Patients (children, adults, mixed or unspecified)                  | 80             | *           | 0.008       |
| Journal type (specialty or non-specialty)                          | 33             | *           | 0.002       |
| Journal epub (yes or no)                                           | 33             |             | <b>0.55</b> |
| Trial size (large or not large)                                    | 71             |             | <b>0.81</b> |
| Trial results (positive or not-positive/unclear)                   | 33             |             | 0.30        |

ISRCTN, International Standard Randomised Controlled Trial Number.

**Table E.** Thematology of included and excluded trials’.

| No               | Trial ID                          | Thematology                       | Title                                                                                                                                                                                           |
|------------------|-----------------------------------|-----------------------------------|-------------------------------------------------------------------------------------------------------------------------------------------------------------------------------------------------|
| Published trials |                                   |                                   |                                                                                                                                                                                                 |
| 1                | ISRCTN76156631                    | Adhesives                         | Comparing bond failure in direct and indirect bonding techniques                                                                                                                                |
| 2                | NCT02568436                       | Adjunct; laser                    | Effect of Low Level Laser Therapy in Accelerating Tooth Movement For Dental Crowding Cases                                                                                                      |
| 3                | NCT02209818                       | Adjunct; laser                    | Effect of Laser Application in Pain Management Following the Use of Orthodontic Elastomeric Separators                                                                                          |
| 4                | NCT01490385                       | Adjunct; phototherapy             | The Effect of Light Emitting Diode Phototherapy on the Rate of Orthodontic Tooth Movement - A Clinical Study                                                                                    |
| 5                | NCT02337192                       | Adjunct; phototherapy             | Antimicrobial Photodynamic Therapy Applied in Orthodontic. Orthodontic Patients.                                                                                                                |
| 6                | NCT01695928                       | Adjunct; shockwave                | Effect of Shock Waves on Tooth Movement and Miniscrew Stability                                                                                                                                 |
| 7                | NCT02590835                       | Adjunct; surgical orthodontics    | Efficiency of Piezocision-assisted Orthodontic Treatment in Adult Patients                                                                                                                      |
| 8                | NCT02314975                       | Adjunct; vibration                | Intermittent Vibrational Force and Orthodontic Tooth Movement                                                                                                                                   |
| 9                | ISRCTN27557210                    | Bacteraemia                       | An investigation of odontogenic bacteraemia associated with orthodontic treatment procedures                                                                                                    |
| 10               | NCT02332421                       | Canine retraction                 | The Use of a Modified Dentoalveolar Distractor to Retract Maxillary Canines                                                                                                                     |
| 11               | ISRCTN61138858;<br>ISRCTN26364810 | Class II                          | The long-term effects of orthodontic growth modification for severe Class II anomalies                                                                                                          |
| 12               | ISRCTN52655400                    | Class II                          | Prospective comparative study of affects of two functional appliances                                                                                                                           |
| 13               | NCT00519415                       | Class III                         | Comparative Results of Maxillary Deficiency Treatment by Tongue Plate and Facemask in Growing Patients                                                                                          |
| 14               | ISRCTN10014340                    | Class III                         | Early orthodontic treatment for reverse bite: an orthopaedic facemask treatment for children < 10 years old reduces the need for jaw surgery in the late teens                                  |
| 15               | ISRCTN79884739                    | Chewing gum                       | Chewing gum and orthodontic pain                                                                                                                                                                |
| 16               | NCT01637948                       | Mouthwash; complementary medicine | Controlled Clinical Trial of Traditional Chinese Medicine Mouthrinse                                                                                                                            |
| 17               | ISRCTN38986023                    | Orthognathic                      | A prospective randomised clinical trial to assess change in nasal soft tissue dimensions in orthognathic surgery evaluated using a 3D imaging system                                            |
| 18               | NCT01770782                       | Retention; RME                    | Orthodontic Retention on the Maxillary Stability After SARME Using Laser Scanner                                                                                                                |
| 19               | ISRCTN67900267                    | Brackets; self-ligating           | A prospective randomized trial investigating lower incisor inclination and mandibular arch dimensional changes of two pre-adjusted edgewise orthodontic bracket systems in non-extraction cases |
| 20               | ISRCTN51381850                    | Brackets; self-ligating           | A randomised controlled trial comparing conventional, active and passive self-ligating orthodontic bracket systems                                                                              |
| 21               | ISRCTN05296896                    | Brackets; self-ligating           | A prospective randomised clinical trial to compare pain levels of two orthodontic fixed bracket systems                                                                                         |
| 22               | ISRCTN66185030                    | Brackets; self-ligating           | A prospective randomized trial investigating the alignment efficiency of two pre-adjusted edgewise orthodontic bracket systems                                                                  |
| 23               | ISRCTN05771195                    | Space closure                     | An investigation of two methods of orthodontic space closure: nickel titanium versus stainless steel springs                                                                                    |
| 24               | ISRCTN24433142                    | TADs; reinforcement               | Palatal implants versus headgear for orthodontic anchorage - a randomised controlled trial                                                                                                      |
| 25               | NCT00995436                       | TADs; reinforcement               | Chesterfield Micro-implant Study Involving Three Types of Anchorage Methods in Orthodontics                                                                                                     |
| 26               | NCT01657539                       | Caries prevention                 | Effect of Probiotics Containing Yogurts on the Composition of Biofilms in Patients Under Orthodontic Treatment                                                                                  |
| 27               | NCT00681135                       | Caries prevention                 | Mechanical Plaque Control and Gingivitis Reduction in Fixed Appliance Patients                                                                                                                  |
| 28               | NCT01768390                       | Caries prevention                 | Caries-preventive Effect of a Dentifrice Containing 5,000 Ppm Fluoride in Orthodontic Patients                                                                                                  |
| 29               | NCT02357771                       | Caries prevention                 | Probiotic Lozenge Reduce Streptococcus Mutans in Plaque in Orthodontic Bracket Patients                                                                                                         |
| 30               | NCT02154594                       | Caries prevention                 | "The Efficacy of Acacia Catechu Mouthrinse as Antiplateau and Antigingivitis Agent in Fixed Orthodontic Appliance Patients.                                                                     |
| 31               | NCT02525458                       | Caries prevention                 | Quaternary Ammonium Methacryloxy Silicate-containing Acrylic Resin                                                                                                                              |
| 32               | NCT01329731                       | Caries treatment                  | Remineralisation of White Spot Lesions by Elmex® gelée in Post-orthodontic Patients                                                                                                             |

|                    |                |                                |                                                                                                                                                                                                               |
|--------------------|----------------|--------------------------------|---------------------------------------------------------------------------------------------------------------------------------------------------------------------------------------------------------------|
| 33                 | NCT01059058    | Caries treatment               | Study of Treatments Used for White Spot Lesions After Orthodontic Treatment.                                                                                                                                  |
| Unpublished trials |                |                                |                                                                                                                                                                                                               |
| 1                  | ISRCTN35457694 | Adhesives                      | A randomised controlled trial investigating the orthodontic bracket bond failure rates using Ortho Solo Universal bond enhancer compared to a conventional bonding primer                                     |
| 2                  | ISRCTN05340070 | Adhesives                      | The effect of a fluoride releasing, non-primer step required, no mix composite: A clinical trial                                                                                                              |
| 3                  | ISRCTN61972161 | Adhesives                      | A randomised prospective clinical trial to compare two different methods of applying a new resin-reinforced chemically-cured "moisture-friendly" glass ionomer cement for the bonding of orthodontic brackets |
| 4                  | ISRCTN41545651 | Adhesives                      | A randomised clinical trial to compare bond failure rates with and without the use of Ortho Solo                                                                                                              |
| 5                  | NCT01745653    | Adjunct; laser                 | Effect of Low Level Laser Therapy on Pain Occurring After Insertion of an Orthodontic Device                                                                                                                  |
| 6                  | NCT02267850    | Adjunct; phototherapy          | Effect of Intra-Oral Photobiomodulation on Orthodontic Treatment Time                                                                                                                                         |
| 7                  | NCT02267824    | Adjunct; phototherapy          | The Effects of Extraoral Photobiomodulation on the Rate of Orthodontic Alignment                                                                                                                              |
| 8                  | NCT01720797    | Adjunct; surgical orthodontics | Alveolar Microperforation for Inflammation-Enhanced Tooth Movement During Orthodontic Treatment                                                                                                               |
| 9                  | NCT02606331    | Adjunct; surgical orthodontics | Efficacy of Minimally Invasive Surgical Technique in Accelerating Orthodontic Treatment                                                                                                                       |
| 10                 | NCT02026258    | Adjunct; surgical orthodontics | Efficiency of Piezotome-Corticision Assisted Orthodontics                                                                                                                                                     |
| 11                 | NCT00830947    | Adjunct; vibration             | Effect of Cyclic Loading (Vibration) on Orthodontic Tooth Movement                                                                                                                                            |
| 12                 | NCT01962012    | Adjunct; vibration             | Effect of AcceleDent® Aura on Orthodontic Tooth Movement With Aligners                                                                                                                                        |
| 13                 | ISRCTN14164814 | Aligners                       | Analysis of gingival fluids of orthodontic patients undergoing different treatments                                                                                                                           |
| 14                 | ISRCTN33826201 | Aligners                       | Invisalign - a concept for the prevention of white spot lesions in teenaged orthodontic patients?                                                                                                             |
| 15                 | NCT02427763    | Aligners                       | Microbiological and Epithelial Evaluation Related to the Use of Orthodontic Thermoplastic Device                                                                                                              |
| 16                 | ISRCTN32707822 | Bands                          | Application of molecular diagnostic methodologies to analyse plaque microbial population shifts associated with placement of fixed orthodontic appliances                                                     |
| 17                 | NCT01654419    | Class II                       | Comparison of the Quantity of Distal Movement of the Upper Canine and Molar                                                                                                                                   |
| 18                 | ISRCTN80447398 | Class II                       | Comparison between twin-block & forsus functional appliances                                                                                                                                                  |
| 19                 | NCT02024139    | Chewing gum                    | Efficacy of Chewing Sugarless Gum for Reduction of Orthodontic Appliance Pain                                                                                                                                 |
| 20                 | ISRCTN46246539 | Impacted teeth                 | Exposure of palatal canines: cover-plate vs periodontal dressing                                                                                                                                              |
| 21                 | ISRCTN83971890 | Impacted teeth                 | An investigation into the management of interrupted incisor teeth                                                                                                                                             |
| 22                 | NCT01771692    | Ligatures                      | A Randomised Clinical Trial: Conventional Ligation vs Figure of 8                                                                                                                                             |
| 23                 | NCT00484744    | Pain medication                | Acetaminophen Versus Ibuprofen for the Control of Immediate and Delayed Pain Following Orthodontic Separator Placement                                                                                        |
| 24                 | NCT01962766    | Myofunctional therapy          | Myofunctional Therapy on Nasal Breathing and Orthodontic Corrections Stability                                                                                                                                |
| 25                 | NCT00213434    | OSAS                           | Evaluation of a Mandibular Advancement Device in the Treatment of Obstructive Sleep Apnea Syndrome                                                                                                            |
| 26                 | ISRCTN14198853 | Patient information            | Do information leaflets entitled "your first visit to the orthodontist" help to improve knowledge of, and satisfaction with, the initial orthodontic consultation                                             |
| 27                 | ISRCTN22535947 | Retention                      | The benefit of prolonged orthodontic retention - a randomised clinical trial                                                                                                                                  |
| 28                 | ISRCTN56295329 | Retention                      | How should patients be supervised during orthodontic retention? A randomised controlled trial                                                                                                                 |
| 29                 | NCT02798822    | RME                            | Maxillary and Mandibular Arch Response to RME: a Multicentric Randomized Controlled Trial                                                                                                                     |
| 30                 | ISRCTN53821842 | RME; CLP                       | Is preliminary orthodontic treatment of benefit to the success of alveolar bone grafting?                                                                                                                     |
| 31                 | NCT01948349    | Brackets; self-ligating        | Impact of Bracket Design and Oral Hygiene Maintenance on Halitosis in the Orthodontic Patient                                                                                                                 |
| 32                 | ISRCTN68289972 | Brackets; self-ligating        | A comparison of mandibular archwidth changes using two different bracket systems                                                                                                                              |
| 33                 | ISRCTN56613406 | Brackets; self-ligating        | Self-ligating brackets and elastomeric rings - a comparison of orthodontic ligation techniques on patient oral hygiene and microbial colonisation                                                             |



|    |                |                                    |                                                                                                                                                       |
|----|----------------|------------------------------------|-------------------------------------------------------------------------------------------------------------------------------------------------------|
| 34 | NCT02745626    | Brackets; self-ligating / aligners | Comparison of Oral Hygiene & Root Resorption During Orthodontic Treatment                                                                             |
| 35 | ISRCTN79526387 | Smoking                            | A randomised controlled trial to assess whether smoking cessation instruction provided by orthodontists to teenage orthodontic patients is beneficial |
| 36 | NCT02427282    | TADs; distalization                | Distalization by Miniscrew                                                                                                                            |
| 37 | ISRCTN29710460 | TADs; reinforcement                | Are microimplants as effective at providing orthodontic anchorage as conventional methods                                                             |
| 38 | ISRCTN97142521 | TADs; reinforcement                | Early Loading of Palatal Implants (ortho-type II) a prospective multicenter randomised controlled clinical trial                                      |
| 39 | NCT01164631    | Tonsillitis                        | Pharyngeal Size in Patients With Obstructive Tonsils Under Orthodontic Treatment                                                                      |
| 40 | NCT02415673    | Wires                              | Alignment Efficiency of Two Thermal Activated Orthodontic Archwire Sequences                                                                          |
| 41 | ISRCTN38412478 | Wires                              | A comparison of the tooth movements achieved with two aligning archwires                                                                              |
| 42 | ISRCTN75477546 | Wires                              | A randomised controlled clinical trial comparing aesthetic arch wires and nickel titanium arch wires in initial alignment                             |
| 43 | ISRCTN04899524 | Caries prevention                  | An in situ study to determine the effects of calcium-based toothpaste in orthodontic patients                                                         |
| 44 | NCT03004196    | Caries prevention                  | Comparison of Efficacy Of Probiotic Toothpaste and Chlorhexidine Mouthwash To Reduce S.Mutans                                                         |
| 45 | NCT01500187    | Caries treatment                   | Fluoride Varnish for Treatment of White Spot Lesions                                                                                                  |
| 46 | NCT01344473    | Caries treatment                   | A Trial of Tooth Mousse to Remineralise Post-orthodontic Treatment White Spot Lesions                                                                 |
| 47 | NCT02424097    | Caries treatment/prevention        | MI Varnish and MI Paste Plus in a Caries Prevention and Remineralization Study                                                                        |
