# Supplementary material for: Randomized clinical trials in orthodontics are rarely registered a priori and often published late or not at all
Source: PLoS One. 2017 Aug 4;12(8):e0182785. doi: 10.1371/journal.pone.0182785 (PMC5544232; doi:10.1371/journal.pone.0182785)
Supplement: S1 Dataset — (XLSX) [file pone.0182785.s003.xlsx]

## Sheet: Sheet1
aa	sour	source	nctnumber	spons	sponsor	pi	subjo	multic	patients	rcountry	rcountryno	affil	large	geo	enroll	startyr	datstart	datcomp	endyr	tod	tdur	comptod	regis	preg	pub	pubj	pubs	pubreas	pubid	pubdat	comppub	comppubd	journ	epubj	orthoj	daysfin	mosfin	yrsfin	publish	unpub5y	pubname	pos	posres	pubft	manft
57	IS	1	ISRCTN33826201	comm	3	Britta A. Jung	0	0	4	Germany	10	1	0	1	60	2014	2014-11-01	01 October 2016	2016	12 January 2017	700	103	pro	1	0	0	0		-							103	3.43	0.28	0	0	-
22	CT	0	NCT02590835	priv	4	France Lambert	0	0	3	Belgium	17	1	0	1	24	2013	01 February 2013	01 October 2015	2015	12 January 2017	972	469	retro	0	1	1	1		27129491	2016-04-29	211	7.03	J Dent Res	1	0	211	7.03	0.58	1	0	Charavet 2016	1	1	1
47	CT	0	NCT01948349	int	1	Taranpreet K Chandhoke	0	0	1	USA	1	1	0	3	40	2012	01 October 2012	2016-09-01	2016	12 January 2017	1431	133	retro	0	0	0	0		-							133	4.43	0.36	0	0	-
63	CT	0	NCT02798822	int	1	Alessandro Ugolini	0	0	1	Italy	6	1	0	1	88	2013	01 June 2013	2015-04-01	2015	12 January 2017	669	652	retro	0	0	0	0	fin rep unpub	25314034							652	21.73	1.79	0	0	Ugolini 2015			1	25314034 was found manually in PMD.
33	CT	0	NCT02525458	priv	4	Siying Liu	0	0	2	China	14	1	0	2	32	2015	01 July 2015	01 January 2016	2016	12 January 2017	184	377	retro	0	1	1	1		26903314	23 February 2016	53	1.77	Sci Rep	1	0	53	1.77	0.15	1	0	Liu 2016	1	1	1
49	CT	0	NCT02424097	int	1	Peter Rechmann	0	0	3	USA	1	1	0	3	40	2013	01 May 2013	01 October 2016	2016	12 January 2017	1249	103	retro	0	0	0	0		-							103	3.43	0.28	0	0	-
28	IS	1	ISRCTN05771195	int	1	Noraina Norman	0	1	1	UK	2	1	0	1	50	2011	2011-04-01	2012-04-01	2012	12 January 2017	366	1747	retro	0	1	1	1		26836747	02 February 2016	1402	46.73	J Orthod	0	1	1402	46.73	3.84	1	0	Norman 2016	0	0	1
68	CT	0	NCT02267824	comm	3	Chung H Kau	0	1	3	USA	1	1	0	3	101	2010	01 December 2010	01 March 2013	2013	12 January 2017	821	1413	retro	0	0	0	0		-							1413	47.1	3.87	0	0	-				24326198 manually identified, but multip issues: no reg; r not in exp-ct; 90 instead of 101 pts. 26762247 is NRS.
44	CT	0	NCT00484744	int	1	Shelliann A Kawamoto	0	0	1	USA	1	1	0	3	35	2007	01 June 2007	01 January 2008	2008	12 January 2017	214	3299	pro	1	0	0	0		-							3299	109.97	9.04	0	1	-
55	IS	1	ISRCTN05340070	gov	2	Samantha Hodge	0	0	2	UK	2	1	0	1	50	2004	17 March 2004	01 July 2007	2007	12 January 2017	1201	3483	pro	1	0	0	0		-							3483	116.1	9.54	0	1	-
11	CT	0	NCT01657539	int	1	Gabriela S Pinto	0	0	1	Brazil	16	1	0	4	30	2011	2011-08-01	01 March 2013	2013	12 January 2017	578	1413	retro	0	1	1	1		24217196	2013-11-06	250	8.33	Caries Res	1	0	250	8.33	0.68	1	0	Pinto 2014	0	0	1
9	CT	0	NCT02568436	int	1	Mohammad Moaffak Al-Sayed Hasan	0	0	3	Syria	3	1	0	2	26	2015	01 July 2015	01 May 2016	2016	12 January 2017	305	256	retro	0	1	1	1		27869476	2016-11-21	204	6.8	Angle	1	1	204	6.8	0.56	1	0	AlSayed Hasan 2016	1	1	1
56	CT	0	NCT02745626	int	1	Madhur Upadhyay	0	0	3	USA	1	1	0	3	60	2011	01 December 2011	2015-11-01	2015	12 January 2017	1431	438	retro	0	0	0	0		-							438	14.6	1.2	0	0	-
66	IS	1	ISRCTN46246539	gov	2	Sirisha Ponduri	0	0	4	UK	2	3	0	1	100	2005	11 October 2005	01 October 2007	2007	12 January 2017	720	3391	retro	0	0	0	0		-							3391	113.03	9.29	0	1	-
36	CT	0	NCT01720797	int	1	Calogero Dolce	0	0	3	USA	1	1	0	3	21	2013	01 February 2013	2015-04-01	2015	12 January 2017	789	652	pro	1	0	0	0		-							652	21.73	1.79	0	0	-
5	IS	1	ISRCTN51381850	gov	2	Nikki Atack	0	0	1	UK	2	3	0	1	100	2006	01 March 2006	2009-04-01	2009	12 January 2017	1127	2843	retro	0	1	1	1		24785921	05 May 2014	1860	62	AJODO	0	1	1860	62	5.1	1	0	Songra 2014	0	0	1	24785921 was found manually in PMD.
40	CT	0	NCT01654419	int	1	Luis A Sanchez	0	0	3	Colombia	13	1	0	4	30	2010	01 March 2010	01 May 2012	2012	12 January 2017	792	1717	retro	0	0	0	0		-							1717	57.23	4.7	0	0	-
54	CT	0	NCT01962012	comm	3	Timothy T Wheeler	0	0	2	USA	1	1	0	3	46	2013	01 October 2013	01 May 2016	2016	12 January 2017	943	256	pro	1	0	0	0		-							256	8.53	0.7	0	0	-
46	CT	0	NCT02024139	int	1	Athbi Alqareer	1	0	3	Kuwait	5	1	0	2	36	2014	01 January 2014	2016-04-01	2016	12 January 2017	821	286	pro	1	0	0	0		-							286	9.53	0.78	0	0	-
20	CT	0	NCT02209818	int	1	Mai Almallah	1	0	3	Syria	11	1	0	2	72	2014	2014-08-01	01 February 2016	2016	12 January 2017	549	346	pro	1	1	1	1		PMC5198451	2016-11-01	274	9	J Clin Diagn Res	1	0	274	9.13	0.75	1	0	Almallah 2016	1	1	1
51	CT	0	NCT02415673	int	1	notgiven	0	0	3	notgiven	19	1	0	4	44	2010	2010-08-01	01 October 2011	2011	12 January 2017	426	1930	retro	0	0	0	0		-							1930	64.33	5.29	0	1	-
26	CT	0	NCT01490385	priv	4	Bryan D Tompson	0	0	3	Canada	15	1	0	3	11	2011	01 July 2011	01 July 2013	2013	12 January 2017	731	1291	retro	0	1	1	1		26216550	28 July 2015	757	25.23	J Orthod	1	1	757	25.23	2.07	1	0	Chung 2015	0	0	1
27	CT	0	NCT00519415	int	1	Mahkameh Mirkarimi	0	0	1	Iran	7	1	0	2	20	2007	2007-09-01	2008-11-01	2008	12 January 2017	427	2994	pro	1	1	1	1		23794693	01 June 2013	1673	55.77	J Orthod	1	1	1673	55.77	4.58	1	0	Showkatbakhsh 2013	0	0	1	23794693 was found manually in PMD.
24	CT	0	NCT02314975	int	1	notgiven	0	0	3	notgiven	19	1	0	1	81	2011	01 June 2011	2014-11-01	2014	12 January 2017	1249	803	retro	0	1	1	3		25758457; 26610843; 27894540	10 March 2015	129	4.3	J Dent Res	1	0	129	4.3	0.35	1	0	Woodhouse 2015a; Woodhouse 2015b; DiBiase 2016	0	0	1
50	CT	0	NCT02026258	int	1	Flavio Uribe	0	0	3	USA	1	1	0	3	41	2011	01 December 2011	01 January 2016	2016	12 January 2017	1492	377	retro	0	0	0	0		-							377	12.57	1.03	0	0	-
25	CT	0	NCT02357771	comm	3	Upendra Jain	0	0	3	India	8	1	0	2	30	2015	2015-04-01	2015-09-01	2015	12 January 2017	153	499	pro	1	1	1	1		x9991998	19 October 2016	414	13.8	J Indian Orthod Soc	0	1	414	13.8	1.13	1	0	Chaturvedi 2016	1	1	1
41	CT	0	NCT03004196	int	1	Chandrika Dubey	0	0	3	India	8	1	0	2	30	2015	2015-09-01	01 October 2015	2015	12 January 2017	30	469	retro	0	0	0	0		-							469	15.63	1.28	0	0	-
59	IS	1	ISRCTN80447398	gov	2	Maria McNally	0	1	1	UK	2	3	0	1	64	2013	2013-09-01	2015-08-31	2015	12 January 2017	729	500	pro	1	0	0	0		-							500	16.67	1.37	0	0	-
39	CT	0	NCT01500187	comm	3	Franklin Garcia-Godoy	0	0	1	USA	1	1	0	3	30	2012	01 February 2012	01 December 2014	2014	12 January 2017	1034	773	pro	1	0	0	0		-							773	25.77	2.12	0	0	-
12	CT	0	NCT01329731	comm	3	Gaba International AG	0	0	3	Germany	10	1	0	1	48	2011	01 March 2011	01 October 2013	2013	12 January 2017	945	1199	retro	0	1	1	2		27702806; 27702807; Thesis	04 October 2016	1099	36.63	Eur J Orthod	1	1	1099	36.63	3.01	1	0	Bock 2016a; Bock 2016b; Seibold 2015	0	0	1
34	IS	1	ISRCTN04899524	int	1	Norah Flannigan	0	0	1	UK	2	1	0	1	12	2014	01 March 2014	01 July 2014	2014	12 January 2017	122	926	pro	1	1	0	0		Thesis							926	30.87	2.54	0	0	Garry 2015			1
31	CT	0	NCT02154594	int	1	Dhanashree R. Agarwal	0	0	3	India	8	1	0	2	60	2014	01 February 2014	01 March 2014	2014	12 January 2017	28	1048	retro	0	1	1	1		x9991999	2015-08-01	518	17.27	J Pharm Biomed Sci	0	0	518	17.27	1.42	1	0	Agarwal 2015	1	1	1
67	IS	1	ISRCTN53821842	int	1	MJC Wake	0	0	4	UK	2	3	0	1	100	2000	2000-04-18	2008-04-18	2008	12 January 2017	2922	3191	retro	0	0	0	0		-							3191	106.37	8.74	0	1	-
3	IS	1	ISRCTN24433142	gov	2	Philip Benson	0	0	1	UK	2	1	0	1	40	2002	01 January 2002	01 June 2005	2005	12 January 2017	1247	4243	retro	0	1	1	2		18005834; 18174071	2007-11-01	883	29.43	AJODO	0	1	883	29.43	2.42	1	0	Benson 2007; Sandler 2008	1	1	1
70	CT	0	NCT01771692	priv	4	David J Spary	0	0	1	UK	2	1	0	1	120	2013	01 January 2013	01 May 2016	2016	12 January 2017	1216	256	pro	1	1	0	0		Thesis							256	8.53	0.7	0	0	Little 2016			1
38	CT	0	NCT02267850	comm	3	Timothy Shaughnessy	0	0	3	USA	1	2	0	3	29	2013	01 May 2013	01 May 2016	2016	12 January 2017	1096	256	retro	0	0	0	0		-							256	8.53	0.7	0	0	-				26762247 is NRS.
65	IS	1	ISRCTN38412478	gov	2	Paul McCusker	0	0	4	UK	2	3	0	1	100	2001	09 May 2001	09 May 2003	2003	12 January 2017	730	4997	retro	0	0	0	0		-							4997	166.57	13.69	0	1	-
71	IS	1	ISRCTN97142521	resfound	4	Britta A. Jung	0	1	4	Germany	10	1	0	1	124	2006	01 December 2006	31 December 2011	2011	12 January 2017	1856	1839	retro	0	0	0	0	fin rep unpub	{17883841}; 20383544	2010-04-10						1839	61.3	5.04	0	1	{Jung 2007}; Jung 2011			1
35	CT	0	NCT02427282	int	1	Riyadh Abdullah Iskander	0	0	1	Egypt	12	1	0	4	20	2012	01 July 2012	01 March 2015	20015	12 January 2017	973	683	retro	0	0	0	0		-							683	22.77	1.87	0	0	-
60	CT	0	NCT01745653	int	1	notgiven	1	0	1	France	11	1	0	1	69	2011	2011-04-01	01 January 2013	2013	12 January 2017	641	1472	retro	0	0	0	0		-							1472	49.07	4.03	0	0	-
15	CT	0	NCT00681135	priv	4	Christopher J. Lux	0	0	3	Germany	10	1	0	1	118	2008	2008-04-01	2011-04-01	2011	12 January 2017	1095	2113	retro	0	1	1	1		23825160	03 July 2013	824	27.47	Eur J Orthod	1	1	824	27.47	2.26	1	0	Zingler 2014	0	0	1
52	CT	0	NCT00830947	comm	3	Peter Gakunga	0	0	2	USA	1	1	0	3	45	2009	01 February 2009	2011-11-01	2011	12 January 2017	1003	1899	pro	1	0	0	0		-							1899	63.3	5.2	0	1	-
14	IS	1	ISRCTN27557210	gov	2	VS Lucas	0	0	1	UK	2	1	0	1	82	2002	01 December 2002	2003-09-01	2003	12 January 2017	274	4882	retro	0	1	1	2		17317865	22 February 2007	1270	42.33	Eur J Orthod	1	1	1270	42.33	3.48	1	0	Lucas 2007	unclear		1
61	CT	0	NCT01962766	int	1	Nelly Huynh	0	0	1	Canada	15	1	0	3	70	2013	01 October 2013	01 October 2014	2014	12 January 2017	365	834	pro	1	0	0	0		-							834	27.8	2.28	0	0	-
64	CT	0	NCT01344473	int	1	David Bearn/Louise Greene	0	0	3	UK	2	1	0	1	90	2011	01 March 2011	2013-11-01	2013	12 January 2017	976	1168	retro	0	0	0	0		-							1168	38.93	3.2	0	0	-
18	CT	0	NCT01637948	int	1	Ricky Wong	0	0	3	Hong Kong	9	1	0	2	90	2010	01 October 2010	01 January 2012	2012	12 January 2017	457	1838	retro	0	1	1	1		23278871	28 December 2012	362	12.07	Int J Paediatr Dent	1	0	362	12.07	0.99	1	0	Chen 2013	unclear		1	23278871 was found manually in PMD.
2	CT	0	NCT01695928	int	1	Hans P Bantleon	0	0	3	Austria	18	1	0	1	30	2012	2012-09-01	01 January 2014	2014	12 January 2017	487	1107	pro	1	1	1	1		25263143	2014-09-29	271	9.03	AJODO	0	1	271	9.03	0.74	1	0	Falkensammer 2014	0	0	1
23	CT	0	NCT01770782	priv	4	Max D Pereira	0	0	3	Brazil	16	1	0	4	30	2009	2009-08-01	01 January 2011	2011	12 January 2017	518	2203	retro	0	1	1	2		23690355; 24785925	20 May 2013	870	29	J Dent Res	1	0	870	29	2.38	1	0	Prado 2013; Prado 2014	1	1	1
32	CT	0	NCT02337192	int	1	Vitor H Panh�ca	0	0	3	Brazil	16	1	0	4	24	2014	01 January 2014	01 December 2014	2014	12 January 2017	334	773	retro	0	1	1	1		27454528; Thesis	25 July 2016	602	20.07	Photomed Laser Surg	1	0	602	20.07	1.65	1	0	Panh�ca 2016; Panh�ca 2015	1	1	1
10	IS	1	ISRCTN38986023	gov	2	Shirley A Cox	0	0	4	UK	2	3	0	1	64	2006	2006-04-19	18 July 2007	2007	12 January 2017	455	3466	retro	0	1	1	1		20304541	20 March 2010	976	32.53	Br J Oral Maxillofac Surg	1	0	976	32.53	2.67	1	0	Howley 2011	unclear		1
42	IS	1	ISRCTN14164814	comm	3	Andrea Deregibus	0	0	2	Italy	6	1	0	1	30	2014	01 May 2014	2016-04-01	2016	12 January 2017	701	286	retro	0	0	0	0		-							286	9.53	0.78	0	0	-				27475935 not on the same subject.
6	IS	1	ISRCTN05296896	gov	2	Mary McKnight	0	0	2	UK	2	3	0	1	112	2005	01 June 2005	30 June 2008	2008	12 January 2017	1125	3118	pro	1	1	1	1		19651344	2009-08-04	400	13.33	AJODO	0	1	400	13.33	1.1	1	0	Pringle 2009	1	1	1
21	CT	0	NCT02332421	int	1	Khaled Alainawi	0	0	3	Syria	3	1	0	2	8	2014	01 June 2014	2015-09-01	2015	12 January 2017	457	499	retro	0	1	1	1		27084863	01 January 2016	122	4.07	J Contemp Dent Pract	0	0	122	4.07	0.33	1	0	Al-Ainawi 2016	1	1	1
62	IS	1	ISRCTN68289972	priv	4	Becky Walker	0	0	1	UK	2	3	0	1	86	2011	01 December 2011	01 December 2013	2013	12 January 2017	731	1138	retro	0	0	0	0		-							1138	37.93	3.12	0	0	-
1	IS	1	ISRCTN67900267	gov	2	Robert T Lee	0	0	1	UK	2	1	0	1	20	2006	2006-09-22	21 May 2007	2007	12 January 2017	241	3524	retro	0	1	1	2		19409342; 19732667	04 May 2009	714	23.8	AJODO	0	1	714	23.8	1.96	1	0	Fleming 2009a; Fleming 2009b	0	0	1
58	IS	1	ISRCTN61972161	int	1	DO Morris	0	0	1	UK	2	1	0	1	60	2001	01 October 2001	01 October 2003	2003	12 January 2017	730	4852	retro	0	0	0	0		-							4852	161.73	13.29	0	1	-
43	IS	1	ISRCTN35457694	gov	2	N W T Harradine	0	0	1	UK	2	1	0	1	33	2004	01 July 2004	30 June 2008	2008	12 January 2017	1460	3118	retro	0	0	0	0	only 6mos rep; fin rep unpub	18287392	21 February 2008						3118	103.93	8.54	0	1	Wenger 2008			1
4	CT	0	NCT00995436	int	1	Jonathan Sandler	0	0	1	UK	2	3	0	1	78	2008	01 July 2008	01 October 2013	2013	12 January 2017	1918	1199	retro	0	1	1	1		24974994; Thesis	30 June 2014	272	9.07	AJODO	0	1	272	9.07	0.75	1	0	Sandler 2014a; Sandler 2014b	0	0	1
48	CT	0	NCT01164631	int	1	Walter R Nunes Jr.	0	0	3	Brazil	16	1	0	4	40	2006	2006-11-01	2009-11-01	2009	12 January 2017	1096	2629	retro	0	0	0	0		-							2629	87.63	7.2	0	1	-
13	IS	1	ISRCTN66185030	gov	2	Martyn Cobourne	0	0	1	UK	2	1	0	1	60	2004	2004-11-08	2006-11-30	2006	12 January 2017	752	3696	retro	0	1	1	1		18339656	13 March 2008	469	15.63	Eur J Orthod	1	1	469	15.63	1.28	1	0	Scott 2008	0	0	1
53	IS	1	ISRCTN29710460	int	1	Safa Jambi	0	1	4	UK	2	1	0	1	45	2008	01 October 2008	2010-04-01	2010	12 January 2017	547	2478	retro	0	1	0	0		Thesis							2478	82.6	6.79	0	1	Jambi 2014			1
69	CT	0	NCT02427763	int	1	Flares Baratto Filho	0	0	3	Brazil	16	1	0	4	105	2014	01 October 2014	01 March 2015	2015	12 January 2017	151	683	retro	0	0	0	0		-							683	22.77	1.87	0	0	-
45	CT	0	NCT02606331	int	1	Alaa Alfawal	0	0	2	Syria	3	1	0	2	36	2015	2015-04-01	01 June 2016	2016	12 January 2017	427	225	retro	0	0	0	0		-							225	7.5	0.62	0	0	-
29	IS	1	ISRCTN10014340	comm/soc	3	Nicky Mandall	0	1	1	UK	2	3	0	1	73	2004	01 January 2004	2014-04-01	2014	12 January 2017	3743	1017	retro	0	1	1	3		20805344; 22984102; 27564126	2016-08-27	879	29.3	J Orthod	0	1	879	29.3	2.41	1	0	Mandall 2010; Mandall 2012; Mandall 2016	1	1	1
37	IS	1	ISRCTN32707822	gov	2	A Ireland	0	0	4	UK	2	1	0	1	25	2005	01 January 2005	01 January 2006	2006	12 January 2017	365	4029	retro	0	0	0	0		-							4029	134.3	11.04	0	1	-				24345204 was found from PMD relatively similar, but the sample size was slightly different without any explanation, the scope was somewhat different, and no registration is reported (the ISRCTN site reports unclear authorship checked on Feb 2016).
72	IS	1	ISRCTN79526387	gov	2	Susi Caldwell	1	0	1	UK	2	1	1	1	200	2009	01 February 2009	30 June 2010	2010	12 January 2017	514	2388	retro	0	0	0	0		-							2388	79.6	6.54	0	1	-
7	IS	1	ISRCTN61138858; ISRCTN26364810	gov; int	2	Kevin O'Brien	0	0	1	UK	2	1	1	1	486	1997	1997-04-01	2006-09-30	2006	12 January 2017	3469	3757	retro; pro	1	1	1	3		12970656; 14614414; 19409339	04 May 2009	947	31.57	AJODO	0	1	947	31.57	2.59	1	0	O'Brien 2003a; O'Brien 2003b; O'Brien 2009	0	0	1
16	IS	1	ISRCTN52655400	gov	2	Andrew DiBiase	0	0	1	UK	2	3	1	1	200	2004	01 October 2004	2007-09-30	2007	12 January 2017	1094	3392	retro	0	1	1	1		23291502	04 January 2013	1923	64.1	Eur J Orthod	1	1	1923	64.1	5.27	1	0	Lee 2014	unclear		1	23291502 was found manually; although 103 pts were included instead of the 200 planned, it was judged to be prior trial stopping.
19	CT	0	NCT01059058	int	1	Greg H Huang	0	0	3	USA	1	1	0	3	240	2010	01 March 2010	01 July 2012	2012	12 January 2017	853	1656	pro	1	1	1	1		23989837	2013-08-30	425	14.17	J Am Dent Assoc	0	0	425	14.17	1.16	1	0	Senestraro 2013	1	1	1	23989837 was found manually in PMD.
17	CT	0	NCT01768390	int	1	Svante HA Twetman	0	0	1	Sweden	4	1	1	1	500	2008	01 January 2008	01 October 2012	2012	12 January 2017	1735	1564	retro	0	1	1	1		24375756	28 December 2013	453	15.1	Eur J Orthod	1	1	453	15.1	1.24	1	0	Sonesson 2014	1	1	1
8	IS	1	ISRCTN79884739	soc	4	A J Ireland	1	0	1	UK	2	1	1	1	1000	2009	19 October 2009	2011-04-01	2011	12 January 2017	529	2113	retro	0	1	1	1		27476354	2016-08-01	1949	64.97	AJODO	0	1	1949	64.97	5.34	1	0	Ireland 2016	1	1	1
78	IS	1	ISRCTN14198853	int	1	M J Brindley	1	0	2	UK	2	1		1		2003	01 October 2003	01 October 2004	2004	12 January 2017	366	4486	retro	0	0	0	0		-							4486	149.53	12.29	0	1	-
77	IS	1	ISRCTN83971890	gov	2	Stephen Chadwick		0	4	UK	2	3		1		2001	2001-09-20	2003-09-20	2003	12 January 2017	730	4863	retro	0	0	0	0		-							4863	162.1	13.32	0	1	-
79	IS	1	ISRCTN56295329	int	1	Megan Hatfield	0	0	4	UK	2	3		1		2003	10 October 2003	2005-09-30	2005	12 January 2017	721	4122	retro	0	0	0	0		-							4122	137.4	11.29	0	1	-
76	IS	1	ISRCTN75477546	gov	2	D Bearn	0	0	1	UK	2	1		1		2005	17 October 2005	16 October 2007	2007	12 January 2017	729	3376	retro	0	0	0	0		-							3376	112.53	9.25	0	1	-
73	CT	0	NCT00213434	int	1	Florence PF Portier	0	0	3	France	11	1		1		2001	2001-11-01	01 June 2006	2006	12 January 2017	1673	3878	retro	0	0	0	0		-							3878	129.27	10.62	0	1	-
30	IS	1	ISRCTN76156631	gov	2	Shanthi Thiyagarajah	0	0	4	UK	2	3		1		2002	24 May 2002	31 May 2004	2004	12 January 2017	738	4609	retro	0	1	1	1		16926313	2006-08-23	814	27.13	J Orthod	0	1	814	27.13	2.23	1	0	Thiyagarajah 2006	0	0	1
80	IS	1	ISRCTN56613406	int	1	Tasnim Hassan	0	0	4	UK	2	3		1		2005	2005-08-01	31 January 2007	2007	12 January 2017	548	3634	retro	0	0	0	0		-							3634	121.13	9.96	0	1	-
74	IS	1	ISRCTN22535947	gov	2	S Caldwell	0	0	4	UK	2	3		1		2003	01 December 2003	01 December 2009	2009	12 January 2017	2192	2599	retro	0	0	0	0		-							2599	86.63	7.12	0	1	-
75	IS	1	ISRCTN41545651	gov	2	Norvishie Arkutu	0	0	4	UK	2	1		1		2005	01 January 2005	01 June 2006	2006	12 January 2017	516	3878	retro	0	0	0	0		-							3878	129.27	10.62	0	1	-
